# Supplementary material for: Lotus japonicus SUNERGOS1 encodes a predicted subunit A of a DNA topoisomerase VI that is required for nodule differentiation and accommodation of rhizobial infection
Source: PubMed Central journal article supplement — Plant J. 2014 May 6;78(5):811–21. doi: 10.1111/tpj.12520 (PMC4282747; doi:10.1111/tpj.12520), 2014-05-06

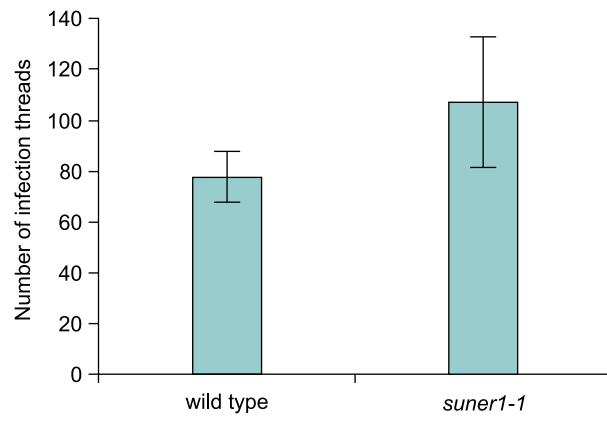

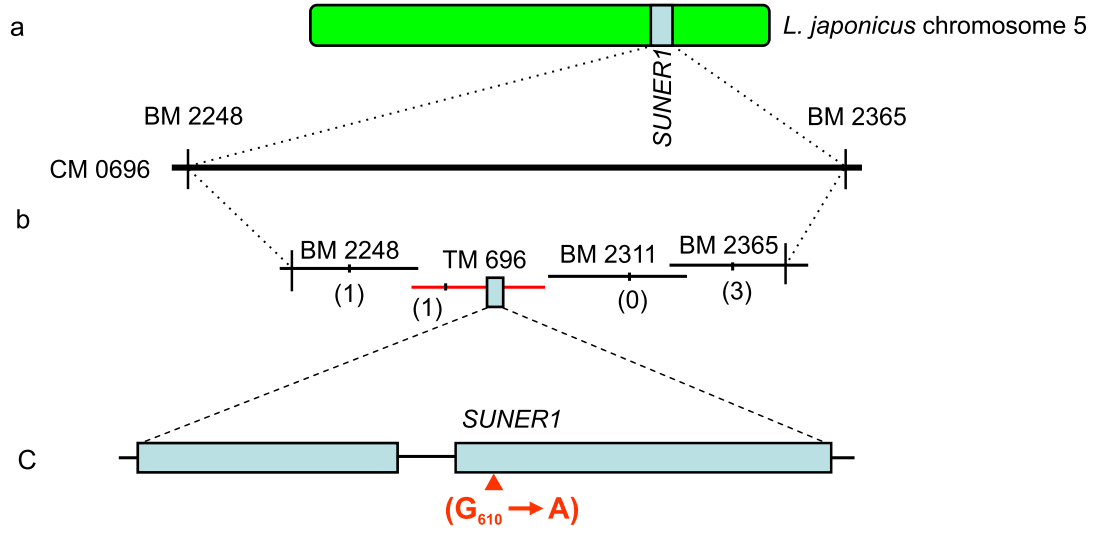

Yoon *et. al.* Figure S3

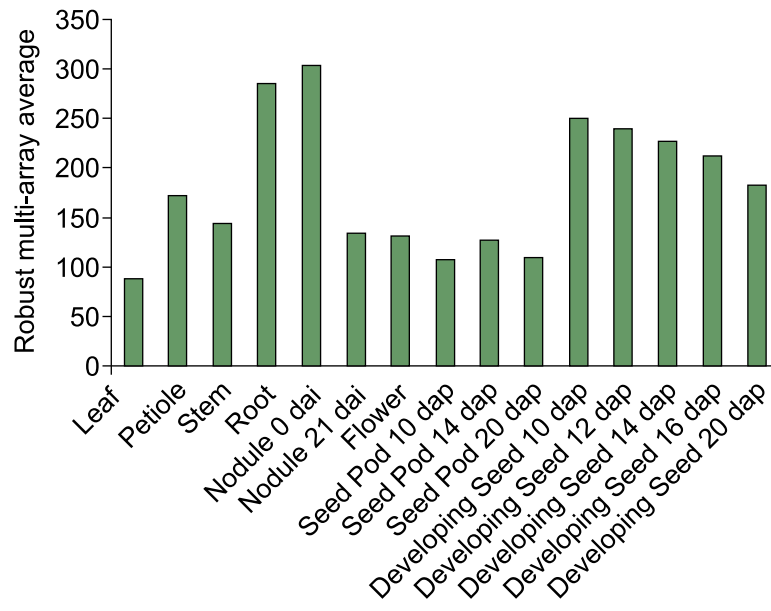

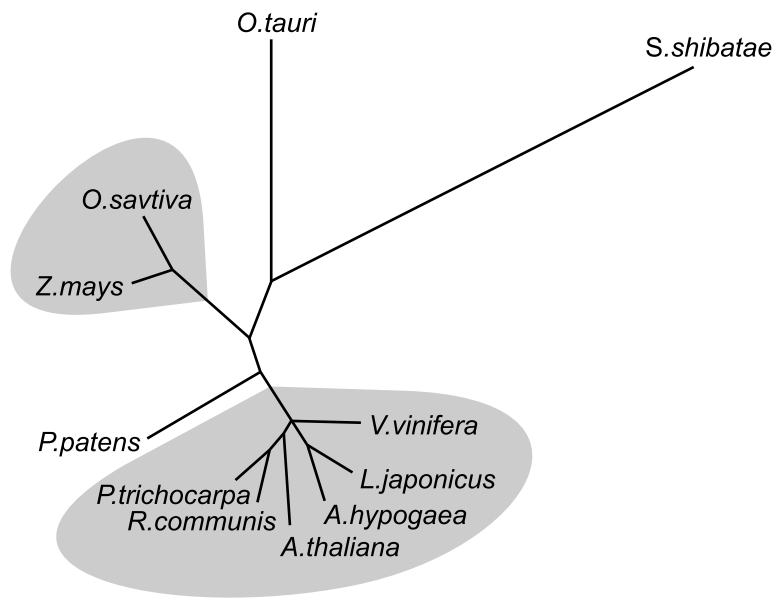

Yoon et. al. Figure S5

*Z. mays* 1 MSEKRRRAGASAAGAA-SSSKKPRASSAASYAESLRSKLR---PDASTIATLRLSLASAS  
*O. sativa* 1 MSEKRRRGAGAGAASGSASKKPRVSTAASYAESLRSKLR---PDASTIATLRLSLASAC  
*L. japonicus* 1 MADGK-----KRRRTDPTENS--LFFKNKLLK---PDSVILETLKDFSTSS  
*A. hypogaea* 1 MAESS-----KRRRTNTDD---LFFKNKLLK---PDSTLIQILKDFSTSS  
*V. vinifera* 1 MADKK-----KRRRTDPSDSQQHLELFFKNSLK---SDEITLQTLKDLCSSS  
*R. communis* 1 MADTT-----KSKKRRRADPESTT--ELFFKNSLK---PDSVILETLNSLLQSL-  
*P. trichocarpa* 1 MADSTS-----TKSRKRRQDPDSTT--ELFFKNLLK---PDSVILQTLQSLVLS-  
*A. thaliana* 1 MADKK-----KRRRSKDDEAE--ELFFKSLLE---SDDVITELLSYIISSS  
*P. patens* 1 MSSDG-----PKQTQAA---LAFKKLLK---SDPDLTKIVTKFAEAA  
*O. tauri* 1 MSAER-----RKVSADAGVNFALARLRDGEDGRPGSTSEVLRANDLEREV  
*S. shibatae* 1 -----

*Z. mays* 56 -----ASKSKAD---ARSLADHPCADPAS SYIVVADQDSTSVTSRINRLVLAALAA  
*O. sativa* 57 SKSKPAGS SSSSSSA---SKALAAED---DPAA SYIVVADQDASVTSINRLVLAALAA  
*L. japonicus* 41 -----SASSSSSAADKT LTLQDLS---LFFRCREVADLSLSSVQSNLESHARKLA  
*A. hypogaea* 40 -----SSSSSS---KALTLQDLS---LFFSCREVSDLSLSSVQSIIEISLVRLFA  
*V. vinifera* 44 -----SSDGAAG---TLTSLDLG---LASTCREVADLSLSSVQSTIETLILRLT  
*R. communis* 44 -----SSSSSS---KPLTLSDLG---LSTCREVTDLSSLSSVQSVIEFVVLST  
*P. trichocarpa* 46 -----TASASSS---KPLTLSDLG---LSSSCREVADLSLTSVQSEIEAETISLV  
*A. thaliana* 42 IKAAAGAGGASSSSS---KPLTLADLS---LSSSCREVADLSLSSVQTEIETVIVQLA  
*P. patens* 38 K-----EADVEIR---TLADLN---LANSCKEVVLEINTRSVVLEVEKSLALA  
*O. tauri* 47 -----KARGVKR---KTLNDLS---LAAYREVVDREGGETAAAIEQVMLAVA  
*S. shibatae* 1 -----MS-----SEFISKVDKEARRKAANIIRDKFLNIV

*Z. mays* 103 RSILSGRGFSFVPSRAASNOVYLPDLDRIVLVRRESARPFANVATARKATITARVLSLV  
*O. sativa* 109 RSILSGRGFSFVPSRAASNOVYLPDLNRIVLVRRESARPFANVATARKATITARVLFV  
*L. japonicus* 89 HSILTGNGFAFDVPSRSANQLYVPELDRIVLKDSSLRPFANVSTVRKSAITARILEL  
*A. hypogaea* 84 HSILSGNGFAFDVPSRSANQLYVPELDRIVLKDSSLRPFANVSTVRKSAITARILQLV  
*V. vinifera* 87 HSILSGOGFSFVPSRSANQLYVPELDRIVLKDSSLRPFANVSTVRKSAVITRILQL  
*R. communis* 88 QSILSGEGFSFVPSRAATNQLYVPELDRIVLKDKNILRPFANVSSVRKSTITAKILSLV  
*P. trichocarpa* 90 QSILSGRGFSFVPSRSANQLYVPELDRIVLKDKNILRPFANVSSVRKCTITARILSL  
*A. thaliana* 94 RSILAGDGFSSVPSRAASNOVYVPELDRIVLKDSSLRPFANVSSVRKTTITRILAL  
*P. patens* 80 KSILSGNGFGYLTPSRSANQLYVPELDRIVLKDASRPFANVAVSRKTAITRILQLV  
*O. tauri* 89 RSVMRGDFEYTPSRGATDQVYVEALDRIVLKNKTRAAFGTSSVRKVTILTRVMQLV  
*S. shibatae* 30 EQIKKGEPLVMEIPMRLSNALYDEKRLLLIGEKKLRNFLDNEAKRFMQTVLMASTL

TP6A\_N

*Z. mays* 163 HAVLGRGTHVTKRDLFYT-----DVKLFGDQTSDAVLDDVSCMLGCT  
*O. sativa* 169 HAVLRGTHVTKRDLFYT-----DVKLFGDQAQSDAVLDDVSCMLGCT  
*L. japonicus* 149 HQLCLKGTHVTKRDLFYT-----DVKLFGDQTSQSDVLLDDVSCMLGCT  
*A. hypogaea* 144 HQLCLKGTHVTKRDLFYT-----DVKLFGDQTSQSDVLLDDVSCMLGCT  
*V. vinifera* 147 HQLCTKNTHVTKRDLFYT-----DVKLFGDQTSQSDVLLDDVSCMLGCT  
*R. communis* 148 HQLCLKNTHVTKRDLFYT-----DVKLFGDQTSQSDAVLDDVSCMLGCT  
*P. trichocarpa* 150 HQLCLKSITHVTKRDLFYT-----DVKLFGDQTSQSDAVLDDVSCMLGCT  
*A. thaliana* 154 HQLCLRNIHVTKRDLFYT-----DVKLFGDQTSQSDAVLDDVSCMLGCT  
*P. patens* 140 HQLCTKQTHVTKRDLFYT-----DVKLFGDQTSQSDTLLDDVSCMLGCT  
*O. tauri* 149 HGVLSRGIHVTKRDLFYT-----DVKLFRDQKSDAVLDDVSCMLGCT  
*S. shibatae* 90 YDALVSDEYPTIIRDLYRGRKHSLLLKSIENKIVSEENTWDECKESDVIIVDEVFVTSLL

*Z. mays* 206 RSSLHVVAS EKGVVVGRLLFADPDRIDCTRMGVGGKAIPPNI DRVSGEESDALFILLVE  
*O. sativa* 212 RSSLHVVAS EKGVVVGRLLFADPDRIDCTRMGVGGKAIPPNI DRVSGEESDALFILLVE  
*L. japonicus* 192 RSSLNVVAA EKGVVVGRLLFSDNGDMIDCTKMGMGGAIPPNI DRVGDMSDALFILLVE  
*A. hypogaea* 187 RSSLNVVAA EKGVVVGRLLFSDNGDMIDCTKMGMGGAIPPNI DRVGDMSDALFILLVE  
*V. vinifera* 190 RSSLNVVAA EKGVVVGRLLFSDNGDMIDCTKMGMGGAIPPNI DRVGDMSDALFILLVE  
*R. communis* 191 RSSLNVVAA EKGVVVGRLLFSDNGDMIDCTKMGMGGAIPPNI DRVGDMSDALFILLVE  
*P. trichocarpa* 193 RSSLNVVAA EKGVVVGRLLFSDNGDMIDCTKMGMGGAIPPNI DRVGDMSDALFILLVE  
*A. thaliana* 197 RSSLNVVAA EKGVVVGRLLFSDNGDMIDCTKMGMGGAIPPNI DRVGDMSDAFILLVE  
*P. patens* 183 RSSLNVVAS EKGVVVGRLLFIIDPDRIDCTRMGVGGKAIPPNI DRVSGEESDALFILLVE  
*O. tauri* 192 RNSLHVVAS EKGVVVGRLLQYKEDPDRIDCTKMGVGGKAIPPNI DRVDMRTDARFVLLVE  
*S. shibatae* 150 REEMLIISK EKGVVVGRLLRIRSGNDVIDLDSKTCGAYATEPTPDLIDFDVDAEIVLVE

Yoon *et. al.* Figure S5 cont'd

TOPRIM

ooo

|                       |     |                                                                 |
|-----------------------|-----|-----------------------------------------------------------------|
| <i>Z. mays</i>        | 266 | KDAAFMRLAEDRFYNRFPCIIITAKGQPDVATRLFLRRLKVELKLPVLALVSDPYGLKI     |
| <i>O. sativa</i>      | 272 | KDAAFMRLAEDRFYNRFPCIIITAKGQPDVATRLFLRRLKVELKLPVLALVSDPYGLKI     |
| <i>L. japonicus</i>   | 252 | KDAAYMRLAEDRFYNRFPCIIIVTAKGQPDVSTRFLRKMKMEKLPVLALVSDPYGLKI      |
| <i>A. hypogaea</i>    | 247 | KDAAYMRLAEDRFYNRFPCIIIVTAKGQPDVATRLFLRKMKMEKLPVLALVSDPYGLKI     |
| <i>V. vinifera</i>    | 250 | KDAAYTRLAEDRFYNRFPCIIIVTAKGQPDVATRLFLRKMKTEKLPVLALVSDPYGLKI     |
| <i>R. communis</i>    | 251 | KDAAYMRLAEDRFYNRFPCIIIVTAKGQPDVATRLFLRKMKMEKLPVLALVSDPYGLKI     |
| <i>P. trichocarpa</i> | 253 | KDAAYMRLAEDRFYNRFPCIIIVTAKGQPDVATRLFLRKMKTEKLPVLALVSDPYGLKI     |
| <i>A. thaliana</i>    | 257 | KDAAYMRLAEDRFYNRFPCIIIVTAKGQPDVATRLFLRKMKMEKLPVLALVSDPYGLKI     |
| <i>P. patens</i>      | 243 | KDAAFMRLAEDRFYNRFPCVIIITAKGQPDVATRLFLRKMKTDLKLPVLGLVSDPYGLKI    |
| <i>O. tauri</i>       | 252 | KDAAFMRLAEDRFYNRFPCIIITAKGQPDVATRLFLSKVWRDLKLPVLALVADPYGLKI     |
| <i>S. shibatae</i>    | 210 | KDAVFQQLHRAGFHWKQYKSLIITSAAGQPDRAIRREVRRLNEELKLPVYITLTDADPYGWTI |

|                       |     |                                                                |
|-----------------------|-----|----------------------------------------------------------------|
| <i>Z. mays</i>        | 326 | LSVYMCCKSKNMSYDSANLTPDIKWLGVRP----SDDLKRYRVEPQCR----LPMTDHDII  |
| <i>O. sativa</i>      | 332 | LSVYMCCKSKNMSYDSANLTPDIKWPQVGRP----SDDLKRYRVEPQCR----LPMTDHDII |
| <i>L. japonicus</i>   | 312 | LSVYGCGSKNMSYDSAHLLTPDIKWLGVRP----SDDLKYKIEPQCR----LPMTQDII    |
| <i>A. hypogaea</i>    | 307 | LSVYGCGSKNMSYDSANLTPDIKWLGVRP----SDDLKYKIEPQCR----LPMTQDII     |
| <i>V. vinifera</i>    | 310 | LSVYGCGSKNMSYDSANLTPDIKWLGLRP----SDDLKYSIPEQCR----LPMTQDII     |
| <i>R. communis</i>    | 311 | LSVYGCGSKNMSYDSANLTPDIKWLGLRP----SDDLKYKIEPQCR----LPMTQDII     |
| <i>P. trichocarpa</i> | 313 | LSVYGCGSKNMSYDSANLTPDIKWLGLRP----SDDLKYKIEPQCR----LPMTQDII     |
| <i>A. thaliana</i>    | 317 | LSVYGCGSKNMSYDSANLTPDIKWLGLRP----SDDLKYKIEPQCR----LPMTQDII     |
| <i>P. patens</i>      | 303 | LSVYMSGSKNMSYDSSNLTPDIKWLGVRP----SDDLKRYKIEPQCR----LPMSDQDII   |
| <i>O. tauri</i>       | 312 | LSVYMQGSKNMAHDSANLTPDIKWLGVRP----SDDLKRFKIEPQCR----LDMSAKDI    |
| <i>S. shibatae</i>    | 270 | FSVFRIGSISISYFSERLATPDAKFLGVSMGDI FGNSRKKPYISEAEKKNYIKAKDADI   |

|                       |     |                                                               |
|-----------------------|-----|---------------------------------------------------------------|
| <i>Z. mays</i>        | 377 | KVGKELLEEDFVKQNEGWVKELETMLRTKQKAEIQALSSFGFOYLTDEVYLPKLQEQDWE  |
| <i>O. sativa</i>      | 383 | KVGKELLEEDFVKQNEGWVKELETMLRTKQKAEIQALSSFGFOYLTDEVYLPKLQEQDWE  |
| <i>L. japonicus</i>   | 363 | KTGKDLLEEDFVKKNPGWVEELNLMVKTQKAEIQALSIFGFOYLSEVYLPKLQEQDWE    |
| <i>A. hypogaea</i>    | 358 | KTGKDLLEEDFVKKNPGWVEELNLMVKTQKAEIQALSIFGFOYLSEVYLPKLQEQDWE    |
| <i>V. vinifera</i>    | 361 | KTGKDLLEEDFVKKNPGWVEELNLMVKTQKAEIQALSSFGFOYLSEVYLPKLQEQDWE    |
| <i>R. communis</i>    | 362 | KTGKDLLEEDFVKKNPGWVEELNLMVKTQKAEIQALSSFGFOYLSEVYLPKLQEQDWE    |
| <i>P. trichocarpa</i> | 364 | KTGKDLLEEDFVKKNPGWVEELNLMVKTQKAEIQALSSFGFOYLSEVYLPKLQEQDWE    |
| <i>A. thaliana</i>    | 368 | KTGKDLLEEDFVKKNPGWVEELNLMVKTQKAEIQALSSFGFOYLSEVYLPKLQEQDWE    |
| <i>P. patens</i>      | 354 | KTGKDLLEEDFVKKNVWKELETMLVKTQKAEIQALSSFGFOYLSEVYLPKLQEQDWE     |
| <i>O. tauri</i>       | 363 | ETGQHMINEEDFVKQNEFWVKEINLMLFTKTKAEIQALSAYGFOYLTQVYLPKLQEQDWE  |
| <i>S. shibatae</i>    | 330 | KRAEETKNYEWFKT-KAWQEEINLFLQRRKAKLETEAMASKGLKELAFQYIPEKLTNKDYI |

|                       |     |   |
|-----------------------|-----|---|
| <i>Z. mays</i>        | 437 | - |
| <i>O. sativa</i>      | 443 | - |
| <i>L. japonicus</i>   | 423 | - |
| <i>A. hypogaea</i>    | 418 | - |
| <i>V. vinifera</i>    | 421 | - |
| <i>R. communis</i>    | -   | - |
| <i>P. trichocarpa</i> | 424 | - |
| <i>A. thaliana</i>    | 428 | - |
| <i>P. patens</i>      | 414 | - |
| <i>O. tauri</i>       | -   | - |
| <i>S. shibatae</i>    | 389 | A |

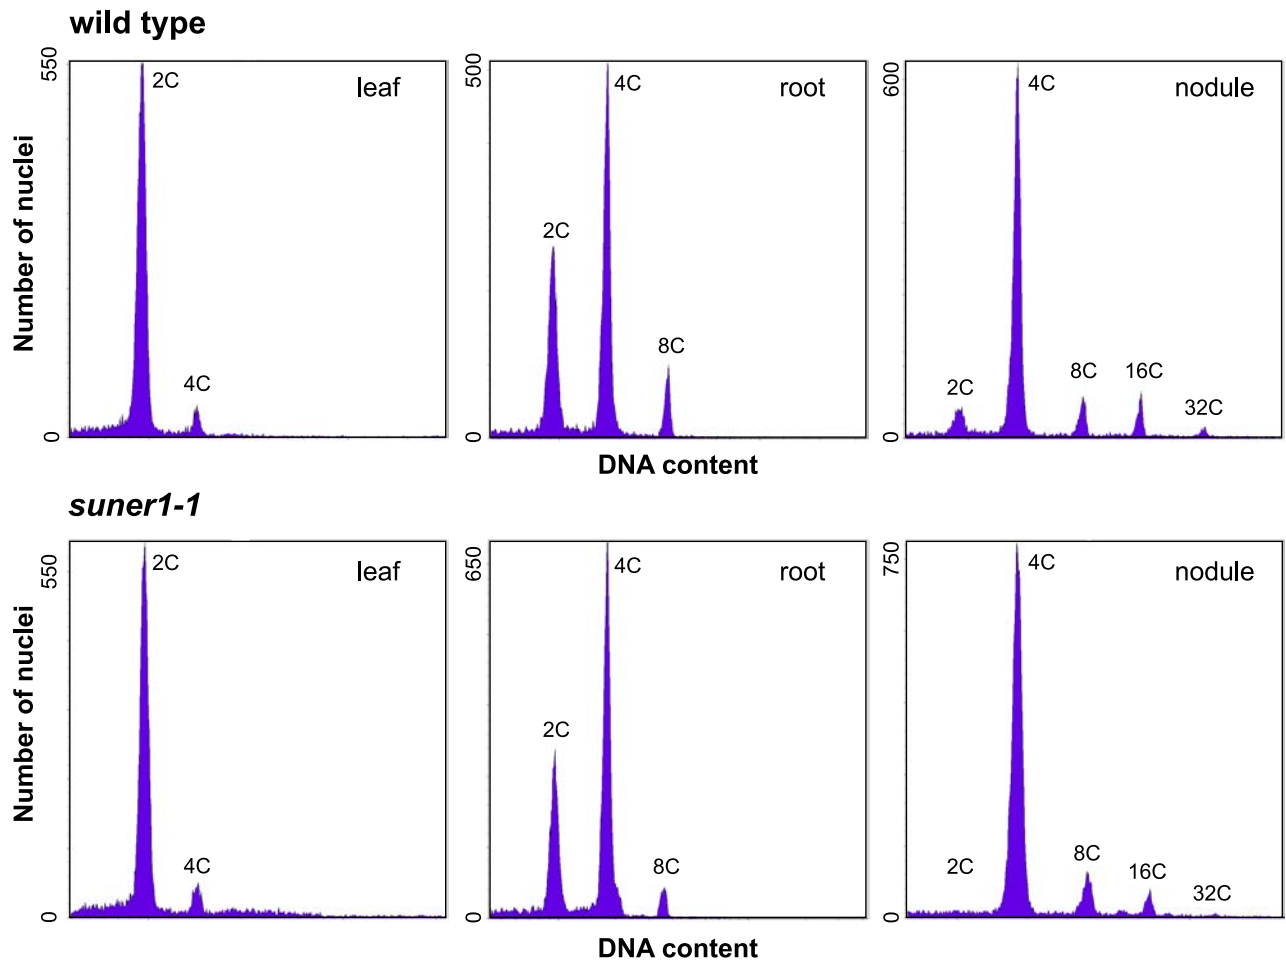

Supplement: tpj0078-0811-sd1.pdf [file tpj0078-0811-sd1.pdf]
