# Supplementary material for: Lotus japonicus SUNERGOS1 encodes a predicted subunit A of a DNA topoisomerase VI that is required for nodule differentiation and accommodation of rhizobial infection
Source: PubMed Central journal article supplement — Plant J. 2014 May 6;78(5):811–21. doi: 10.1111/tpj.12520 (PMC4282747; doi:10.1111/tpj.12520), 2014-05-06
Supplement: tpj0078-0811-sd2.pdf [file tpj0078-0811-sd2.pdf]

Yoon et. al. Table S1

| <b>Genotype</b>          | <b>Expected</b> | <b>Observed</b> |
|--------------------------|-----------------|-----------------|
| <i>SUNER1 SUNER1</i>     | 46.75           | 48              |
| <i>SUNER1 suner1-1</i>   | 93.50           | 92              |
| <i>suner1-1 suner1-1</i> | 46.75           | 47              |
| <b>Total</b>             | 187             | 187             |

| <b>Species</b>                    | <b>Protein</b> | <b>Acc. No.</b>                | <b>Identities</b> | <b>Similarities</b> |
|-----------------------------------|----------------|--------------------------------|-------------------|---------------------|
| <i>Arachis hypogaea</i>           | predicted      | <a href="#">EZ732608</a>       | 90                | 95                  |
| <i>Arabidopsis thaliana</i>       | RHL2           | <a href="#">NP_195902.1</a>    | 85                | 93                  |
| <i>Vitis vinifera</i>             | predicted      | <a href="#">XP_002274790.1</a> | 85                | 91                  |
| <i>Populus trichocarpa</i>        | predicted      | <a href="#">XP_002326329.1</a> | 85                | 92                  |
| <i>Ricinus communis</i>           | spo11          | <a href="#">XP_002525197.1</a> | 85                | 91                  |
| <i>Physcomitrella patens</i>      | predicted      | <a href="#">XP_001763679.1</a> | 73                | 86                  |
| <i>Selaginella moellendorffii</i> | predicted      | <a href="#">XP_002985538.1</a> | 72                | 84                  |
| <i>Zea mays</i>                   | RHL2           | <a href="#">ACG43435.1</a>     | 69                | 84                  |
| <i>Oryza sativa</i>               | TOP6A          | <a href="#">EAZ26508.1</a>     | 68                | 83                  |
| <i>Ostreococcus tauri</i>         | TOP6A          | <a href="#">XP_003079148.1</a> | 66                | 84                  |
| <i>Sulfolobus shibatae</i>        | TOP6A          | <a href="#">O05208.1</a>       | 31                | 52                  |

| Primer                |       | Primer Sequence (5'-3')          |
|-----------------------|-------|----------------------------------|
| <i>SUNER1</i> Bi-PASA | P     | CGTGCAATCCAACATCGAGTC            |
|                       | Q     | CCACACCCATAAACCGATAAAATC         |
|                       | A     | GGGGCGGGGCGCTGCGGAGAAAGGGA       |
|                       | B     | GCGGGCGGGGAATCAACCTTCCTACAACCA C |
| <i>SUNER1</i> Genomic | F     | GGAAGGTGATTTCTTGGCAGA            |
|                       | R     | AGTTACAACCTGGAAGCGCGTA           |
| <i>SUNER1</i> 5'-RACE | Outer | GTCTTGGAGGGTTAGGGTTTTGT          |
|                       | Inner | CTGAGTCTGGTTTCAGCTTGTTT          |
| <i>SUNER1</i> 3'-RACE | Outer | GATACCTGAGCAGTGTAGGTTGC          |
|                       | Inner | GGGTTGAGGAATTAACCTTTGATGG        |
